# Supplementary material for: Culicoides Midge Bites Modulate the Host Response and Impact on Bluetongue Virus Infection in Sheep
Source: PubMed Central journal article supplement (PMC3885445; doi:10.1371/journal.pone.0083683), 2014-01-08

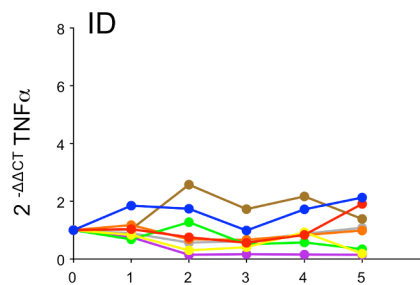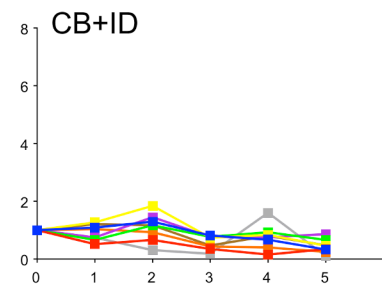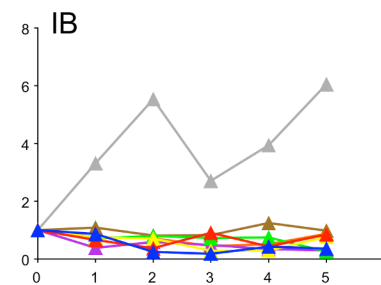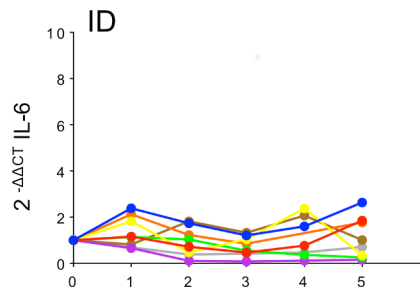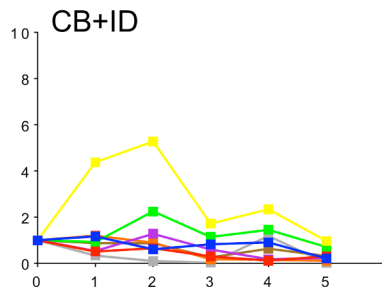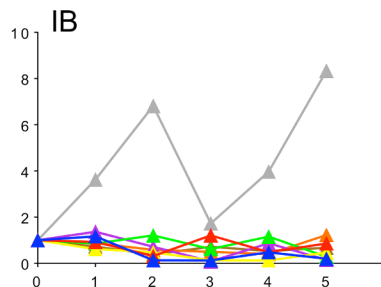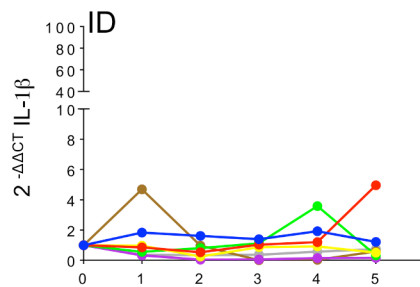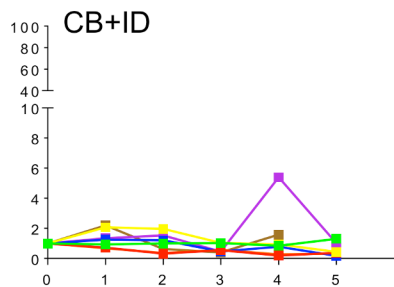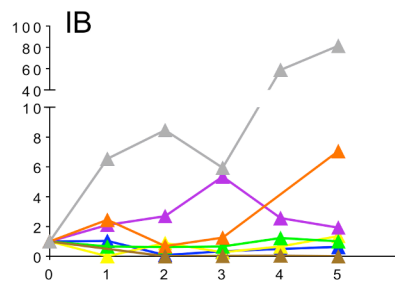

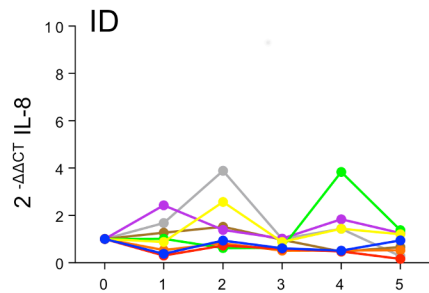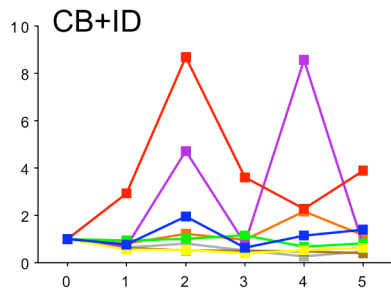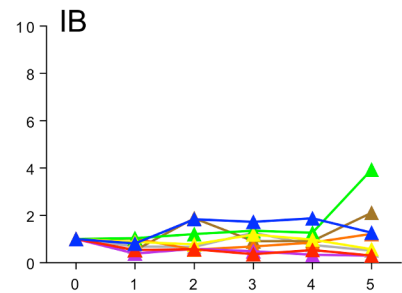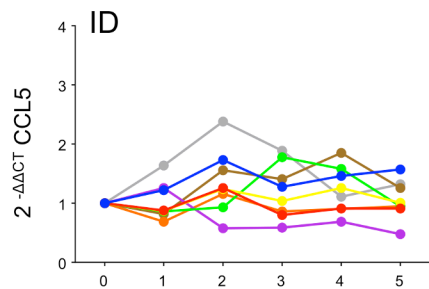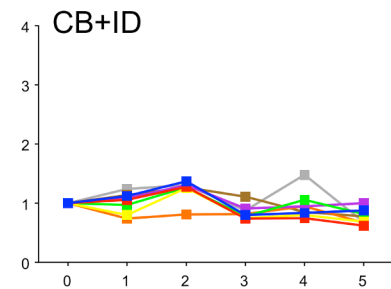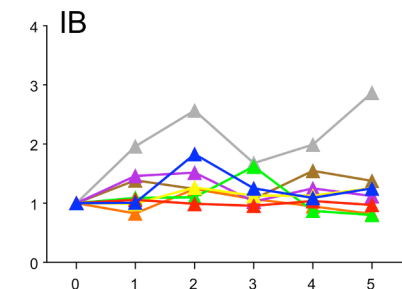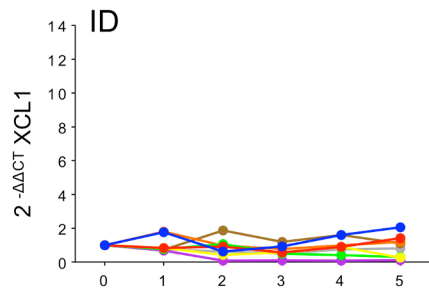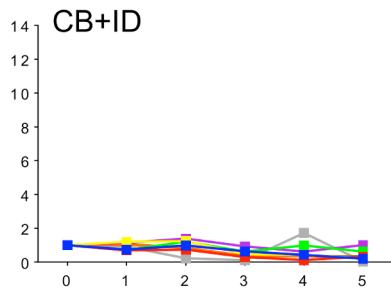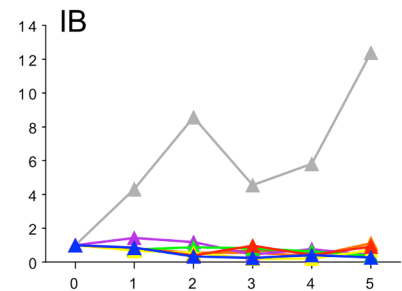

Supplement: pone.0083683.s003.pdf [file pone.0083683.s003.pdf]
